# Supplementary material
Source: Springer Nature journal article supplement (https://www.springermedizin.de/resource/supplementary/13034_2012_186_MOESM1_ESM.pdf/9652510)
Supplement: MOESM1 [file 9652510]

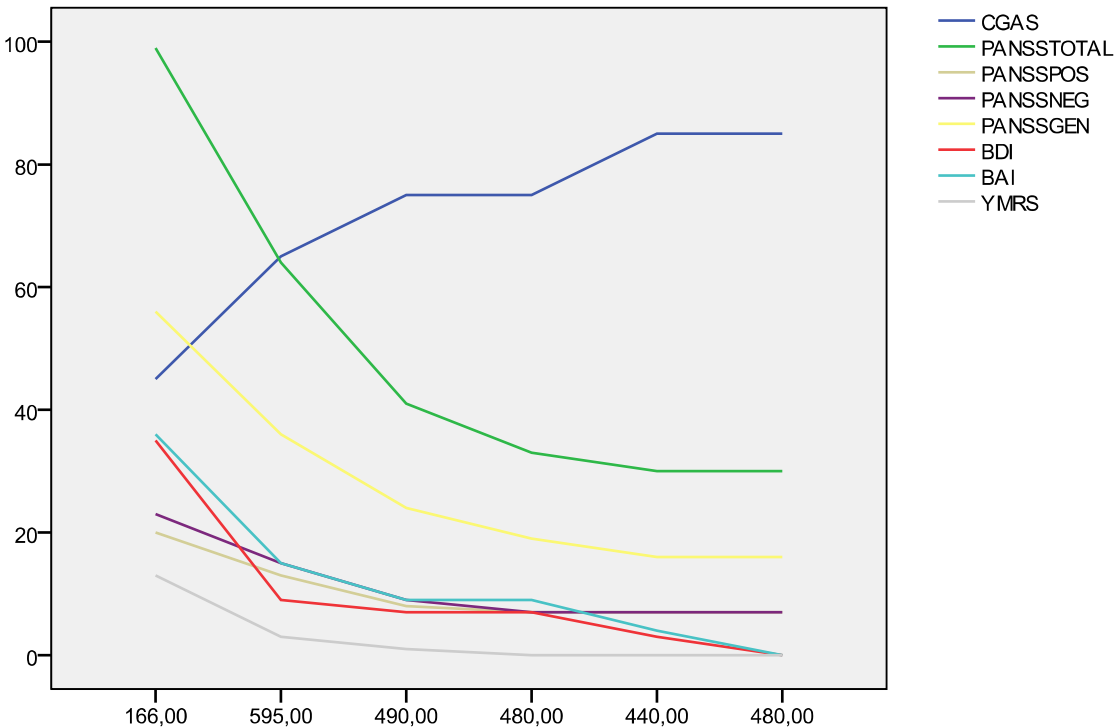

**Vitamin B12 Levels of the patient at baseline, 2nd, 4th, 8th, 12th and 24th weeks compared to psychometric tests**
